# Supplementary material for: Stable SNP Allele Associations With High Grain Zinc Content in Polished Rice (Oryza sativa L.) Identified Based on ddRAD Sequencing
Source: Front Genet. 2020 Aug 11;11:763. doi: 10.3389/fgene.2020.00763 (PMC7432318; doi:10.3389/fgene.2020.00763)
Supplement: TABLE S2 — Descriptive statistic values of nine traits across three environments along with combined values for 40 genotypes. [file Table_2.xlsx]

## Sheet: Supplementary Table 2
Supplementary Table 2. Descriptive statistic values of nine traits across three environments along with combined values for 40 genotypes
Statistic	Year	DFF	PH	PL	NT	SPY	IBR	ZBR	IPR	ZPR
Mean	E1 (Kharif- 2014)	96.73	109.59	24.98	11.19	16.56	12.3	22.36	3.8	14.51
	E2 (Kharif- 2015)	91.63	107.6	24.14	8.34	15.95	8.73	16.81	1.59	12.99
	E3 (Kharif- 2016)	104.1	104.83	23.7	7.81	17.39	6.96	15.72	1.73	11.92
	Combined	97.49	107.34	24.27	9.11	16.63	9.33	18.3	2.37	13.14
SEM	E1 (Kharif- 2014)	2.72	2.66	0.46	1.35	0.48	0.81	0.51	0.09	0.22
	E2 (Kharif- 2015)	1.12	1.13	0.66	0.59	0.68	0.57	0.71	0.14	0.31
	E3 (Kharif- 2016)	1.49	1.12	0.57	0.46	0.39	0.41	0.62	0.25	0.19
	Combined	1.08	0.97	0.32	0.51	0.27	0.36	0.305	0.1	0.13
Skewness	E1 (Kharif- 2014)	2.44	0.07	-0.39	0.67	1.2	0.83	1.01	0.82	1.07
	E2 (Kharif- 2015)	0.21	0.01	0.19	0.45	1.83	0.56	0.51	0.47	0.37
	E3 (Kharif- 2016)	-0.7	-0.03	-0.43	0.77	0.53	0.96	0.93	1.08	1.12
	Combined	0.38	-0.06	-0.13	0.27	1.29	0.31	0.69	0.68	0.53
Kurtosis	E1 (Kharif- 2014)	10.16	-0.78	0.47	-0.29	2.31	0.24	-0.28	-0.44	-0.02
	E2 (Kharif- 2015)	-0.52	-0.85	-0.61	2.36	3.21	-0.16	-0.32	-0.5	-0.82
	E3 (Kharif- 2016)	-0.2	-1.4	0.2	0.56	0.63	0.68	1.24	0.78	1.11
	Combined	1.06	-1.12	0.58	-0.15	3.05	-0.72	-0.77	-0.62	-0.91
Min and Max	E1 (Kharif- 2014)	82	60.4	18.7	5	9.08	5.74	11.08	1.2	5.69
		152	145.4	29.6	19.27	31.78	23.43	42.47	8.77	31.7
	E2 (Kharif- 2015)	71	67.7	19.8	1.6	10.5	4.1	7.05	0.45	4.1
		109	142.9	29	17.6	31.5	15.3	30.4	3.65	22.55
	E3 (Kharif- 2016)	85	60.5	17.5	4.4	7.17	3.8	9.2	0.6	5.8
		118	147.6	28	14	34.57	13.3	26.4	4.1	21.2
	Combined	84.72	62.87	19.24	4.53	8.92	4.71	10.03	1.06	5.2
		114.17	142.57	28.1	13.91	32.45	13.78	29.66	4.74	22.65
CV (%)	E1 (Kharif- 2014)	4.87	4.2	3.18	20.95	5.08	11.48	4	4.31	2.67
	E2 (Kharif- 2015)	2.12	1.82	4.73	12.22	7.37	11.38	7.33	15.31	4.16
	E3 (Kharif- 2016)	2.47	1.85	4.15	10.35	3.93	10.31	6.85	25.45	2.82
	Combined	1.93	1.57	2.3	9.82	2.86	6.7	2.88	7.96	1.8
DFF-Days to fifty percent flowering; PH- Plant Height(cm); PL- Panicle Length(cm); NT- Number of Tillers per plant; SPY- Single Plant Yield(grams); IBR-Iron content in Brown Rice (ppm); ZBR- Zinc content in Brown Rice (ppm); IPR- Iron content in Polished Rice (ppm); ZPR- Zinc content in Polished Rice (ppm).
