# Supplementary material for: Stable SNP Allele Associations With High Grain Zinc Content in Polished Rice (Oryza sativa L.) Identified Based on ddRAD Sequencing
Source: Front Genet. 2020 Aug 11;11:763. doi: 10.3389/fgene.2020.00763 (PMC7432318; doi:10.3389/fgene.2020.00763)
Supplement: TABLE S3 — Environment wise correlation analysis of nine traits among 40 genotypes. [file Table_3.xlsx]

## Sheet: Supplementary Table 3
Supplementary Table 3. Environment wise correlation analysis of nine traits among 40 genotypes
	(E-1) ENVIRONMENT -1 Kharif 2014
		DFF	PH	PL	TNT	SPY	IBR	ZBR	IPR	ZPR
	DFF	1
	PH	0.28	1
		0.078
	PL	0.067	0.429	1
		0.68	0.006
	TNT	-0.021	0.336	0.217	1
		0.89	0.034	0.17
	SPY	-0.24	-0.16	-0.15	-0.227	1
		0.13	0.32	0.35	0.16
	IBR	0.204	0.588	0.284	0.224	-0.301	1
		0.2	<.0001	0.076	0.166	0.059
	ZBR	0.006	0.155	-0.022	0.349	-0.38	0.215	1
		0.971	0.34	0.892	0.027	0.016	0.183
	IPR	-0.007	0.284	0.147	0.422	-0.312	0.449	0.837	1
		0.965	0.076	0.366	0.007	0.05	0.004	(<.0001)
	ZPR	0.053	0.114	-0.017	0.295	-0.358	0.209	0.948	0.773	1
		0.744	0.482	0.917	0.064	0.024	0.195	(<.0001)	(<.0001)
	(E-2) ENVIRONMENT -2 Kharif 2015
		DFF	PH	PL	TNT	SPY	IBR	ZBR	IPR	ZPR
	DFF	1
	PH	-0.371	1
		0.019
	PL	-0.111	0.406	1
		0.497	0.009
	TNT	0.197	-0.092	-0.317	1
		0.224	0.573	0.046
	SPY	0.082	-0.04	-0.11	0.331	1
		0.613	0.807	0.499	0.037
	IBR	-0.351	0.186	0.118	-0.157	-0.289	1
		0.026	0.251	0.467	0.333	0.07
	ZBR	-0.194	0.249	0.229	0.022	-0.241	0.553	1
		0.232	0.122	0.155	0.895	0.134	0
	IPR	0.044	-0.022	-0.077	0.08	-0.114	0.357	0.532	1
		0.788	0.894	0.635	0.623	0.484	0.024	0
	ZPR	-0.246	0.318	0.228	-0.084	-0.292	0.638	0.922	0.512	1
		0.125	0.046	0.158	0.605	0.068	(<.0001)	(<.0001)	0.001
	(E-3) ENVIRONMENT -3 Kharif 2016
		DFF	PH	PL	TNT	SPY	IBR	ZBR	IPR	ZPR
	DFF	1
	PH	-0.416	1
		0.008
	PL	-0.039	0.328	1
		0.812	0.039
	TNT	-0.052	-0.233	0	1
		0.748	0.148	0.999
	SPY	0.114	-0.131	0.103	0.024	1
		0.483	0.422	0.527	0.886
	IBR	-0.158	0.58	0.104	-0.054	-0.445	1
		0.331	(<.0001)	0.524	0.739	0.004
	ZBR	-0.277	0.382	-0.012	-0.144	-0.402	0.741	1
		0.084	0.015	0.943	0.375	0.01	(<.0001)
	IPR	0.07	0.35	0.399	0.018	-0.349	0.527	0.371	1
		0.669	0.027	0.011	0.914	0.027	0.001	0.018
	ZPR	-0.335	0.288	0.063	-0.092	-0.381	0.615	0.852	0.469	1
		0.035	0.072	0.701	0.573	0.015	(<.0001)	(<.0001)	0.002
	DFF-Days to fifty percent flowering; PH- Plant Height(cm); PL- Panicle Length(cm); NT- Number of Tillers per plant; SPY- Single Plant Yield(grams); IBR-Iron content in Brown Rice (ppm); ZBR- Zinc content in Brown Rice (ppm); IPR- Iron content in Polished Rice (ppm); ZPR- Zinc content in Polished Rice (ppm).
