# Supplementary material for: Stable SNP Allele Associations With High Grain Zinc Content in Polished Rice (Oryza sativa L.) Identified Based on ddRAD Sequencing
Source: Front Genet. 2020 Aug 11;11:763. doi: 10.3389/fgene.2020.00763 (PMC7432318; doi:10.3389/fgene.2020.00763)
Supplement: TABLE S4 — Analysis of variance of nine traits of 40 genotypes across three environments. [file Table_4.xlsx]

## Sheet: Supplementary Table 4
Supplementary Table 4. Analysis of variance of nine traits of 40 genotypes across three environments
Traits	SV	ENV	REP(ENV)	GEN	ENV:GEN	Residuals	Total	Principal components
								PC1	PC2
	Df	2	6	39	78	234	359	40	38
DFF	SS	4715.3 ***	32.3**	320.4***	284.9***	10.9	5363.8	17923.0***	4298.2***
	VE (%)	87.9	0.6	6	5.3	0.2	100	80.7	19.3
PH	SS	686.6*	72.1***	4132.4***	210.9***	9.6	5111.6	11944.1 ***	4509.8 ***
	VE (%)	13.4	1.4	80.8	4.1	0.2	100	72.6	27.4
PL	SS	50.5	98.9***	29.3***	9.0***	1	188.8	411.1 ***	297.3 ***
	VE (%)	26.7	52.4	15.5	4.8	0.5	100	58	42
TNT	SS	397.9***	13.2***	38.3***	19.6***	2.4	2.4	981.1 ***	554.3 ***
	VE (%)	84.4	2.8	8.1	4.2	0.5	100	63.9	36.1
SPY	SS	62.9	30.1***	183.1***	26.1***	0.9	303.1	1940.5 ***	96.3 ***
	VE (%)	20.7	9.9	60.4	8.6	0.3	100	95.3	4.7
IBR	SS	886.5**	74.7***	50.3***	16.2***	1.2	1029	922.4 ***	348.0 ***
	VE (%)	86.2	7.3	4.9	1.6	0.1	100	72.6	27.4
IPR	SS	184.9***	4.3***	8.7***	5.1***	0.1	203.3	351.1 ***	49.6 ***
	VE (%)	91	2.1	4.3	2.5	0	100	87.6	12.4
ZBR	SS	1524.6**	105.1***	265.4***	64.1***	1.2	1960.5	4132.6 ***	866.9 ***
	VE (%)	77.8	5.4	13.5	3.3	0.1	100	82.7	17.3
ZPR	SS	202.7*	26.7***	176.1***	36.2***	0.2	0.2	2181.6 ***	644.9 ***
	VE (%)	45.9	6.1	39.8	8.2	0	100	77.2	22.8
Significance level: ‘***’ at 0.001; ‘**’at 0.01 and ‘*’at 0.05.
DFF-Days to fifty percent flowering; PH- Plant Height(cm); PL- Panicle Length(cm); NT- Number of Tillers per plant; SPY- Single Plant Yield(grams); IBR-Iron content in Brown Rice (ppm); ZBR- Zinc content in Brown Rice (ppm); IPR- Iron content in Polished Rice (ppm); ZPR- Zinc content in Polished Rice (ppm).
