# Supplementary material for: Stable SNP Allele Associations With High Grain Zinc Content in Polished Rice (Oryza sativa L.) Identified Based on ddRAD Sequencing
Source: Front Genet. 2020 Aug 11;11:763. doi: 10.3389/fgene.2020.00763 (PMC7432318; doi:10.3389/fgene.2020.00763)
Supplement: TABLE S9 — Distribution of SNP variants across the chromosome in the genomic regions. [file Table_9.xlsx]

## Sheet: Supplementary Table 9
Supplementary Table 9. Distribution of SNP variants across the chromosome in the genomic regions
Chromosome Number	Exonic-3UTR	Exonic-5UTR	Exonic-CDS	Intergenic	Intronic	Intronic-3 Splice_site	Intronic-5 Splice_site	Total SNPs
Chromosome 1	150	48	486	2902	776	10	16	4388
Chromosome 2	133	31	503	2865	784	9	15	4340
Chromosome 3	117	41	377	2464	591	8	16	3614
Chromosome 4	86	10	499	2503	573	16	16	3703
Chromosome 5	92	29	380	1832	431	16	9	2789
Chromosome 6	82	22	433	2124	548	12	18	3239
Chromosome 7	106	45	429	1882	511	11	11	2995
Chromosome 8	89	14	370	1803	494	11	10	2791
Chromosome 9	70	11	309	1518	392	9	11	2320
Chromosome 10	34	5	351	1637	366	5	8	2406
Chromosome 11	76	24	558	2373	608	18	19	3676
Chromosome 12	69	24	375	1906	470	13	19	2876
Min	34	5	309	1518	366	5	8	2320
Max	150	48	558	2902	784	18	19	4388
Mean	92	25	423	2151	545	12	14	3261
Total	1104	304	5070	25809	6544	138	168	39137
